# Supplementary material
Source: HighWire-hosted journal article supplement (https://jnm.snmjournals.org/highwire/filestream/95142/field_highwire_adjunct_files/0/193268_Supplemental_Data.pdf)
Supplement: 193268_Supplemental_Data.pdf [file 193268_Supplemental_Data.pdf]

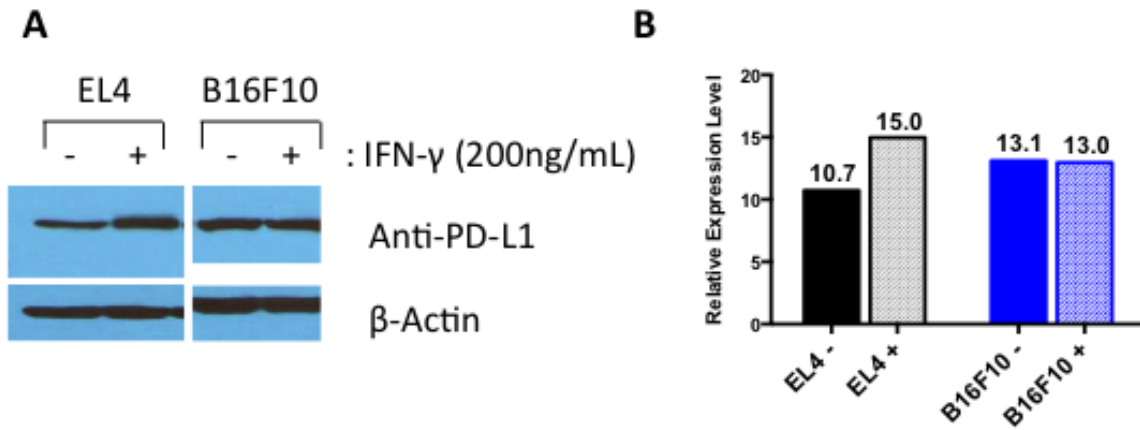

**Supplemental Figure 1.** PD-L1 expression was determined by Western blot analysis in the EL4 and B16F10 murine cell lines, with and without IFN- $\gamma$  (A). Expression was quantified and normalized to  $\beta$ -actin [PD-L1/ $\beta$ -actin], with and without IFN- $\gamma$  (B).

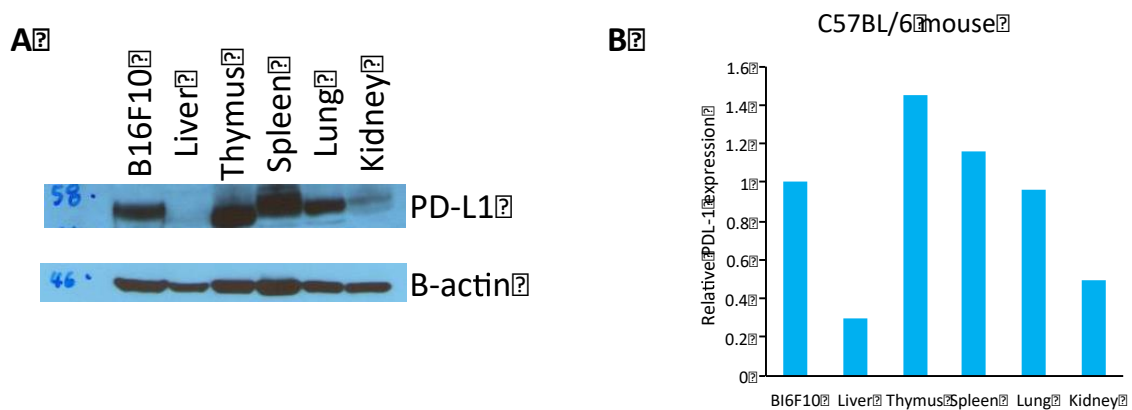

**Supplemental Figure 2.** PD-L1 expression in selected organs of a non-tumor-bearing C57BL/6 mouse was determined by Western blot analysis with B16F10 cells serving as a positive control (A). Expression was quantified and normalized to  $\beta$ -actin [PD-L1/ $\beta$ -actin] and set as a ratio to expression in B16F10 cells (B).

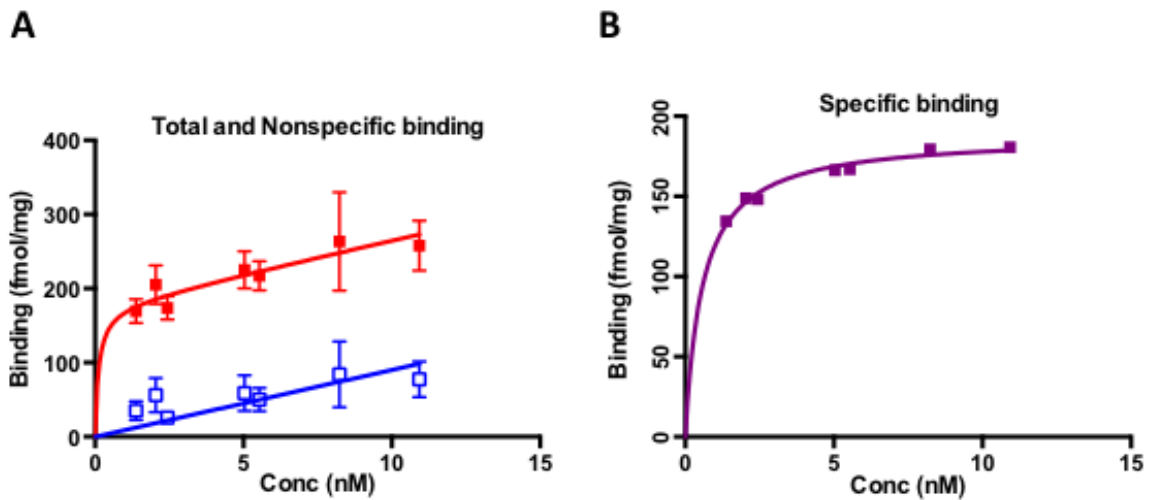

**Supplemental Figure 3.** Binding assays performed with  $^{111}\text{In}$ -DTPA-anti-PD-L1-BC using B16F10 cells treated with IFN- $\gamma$  (400 ng/mL). (A) Total [red] and nonspecific [blue] binding. (B) Specific binding [purple].

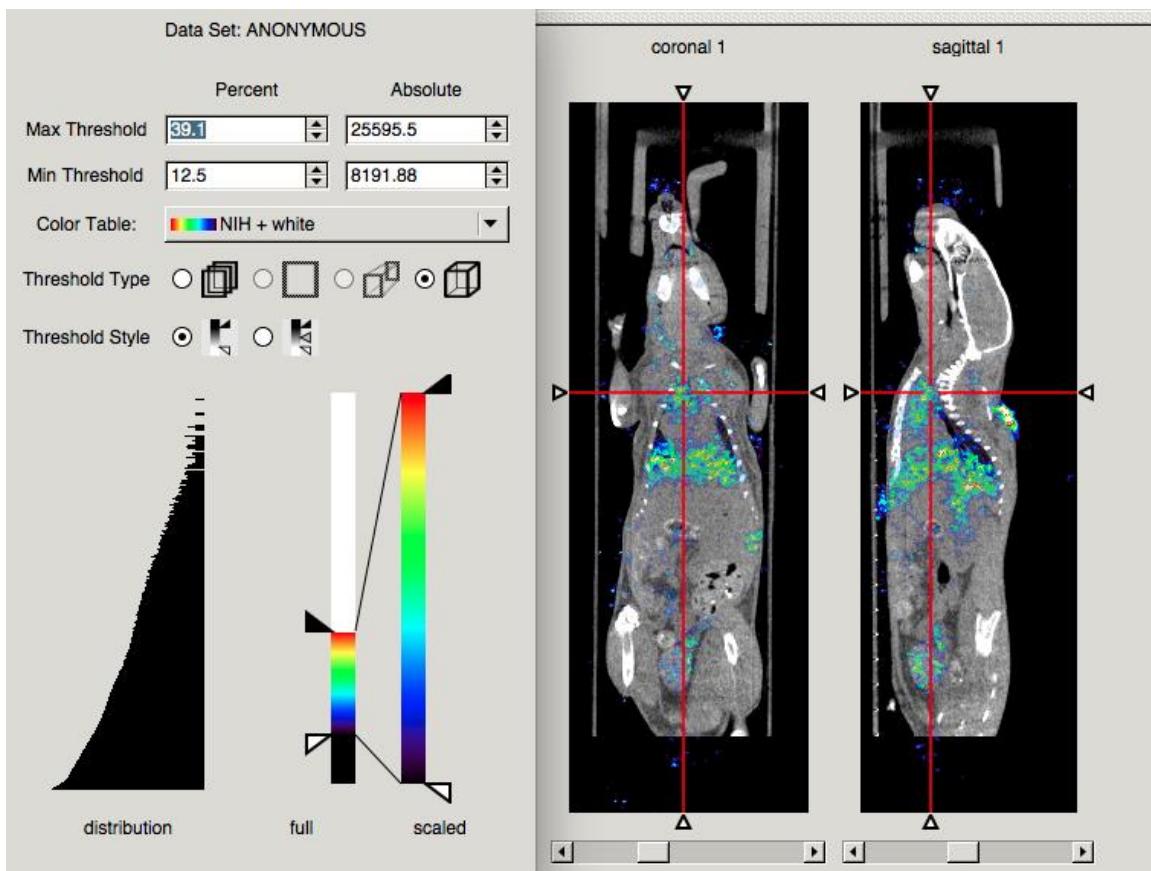

**Supplemental Figure 4.** A coronal and sagittal slice of a whole-body SPECT image of  $^{111}\text{In}$ -DTPA-anti-PD-L1-BC 24 hrs after injection in a prone C57BL/6 mouse bearing a B16F10 tumor. Signal from the thymus is highlighted by the red cross arrows.

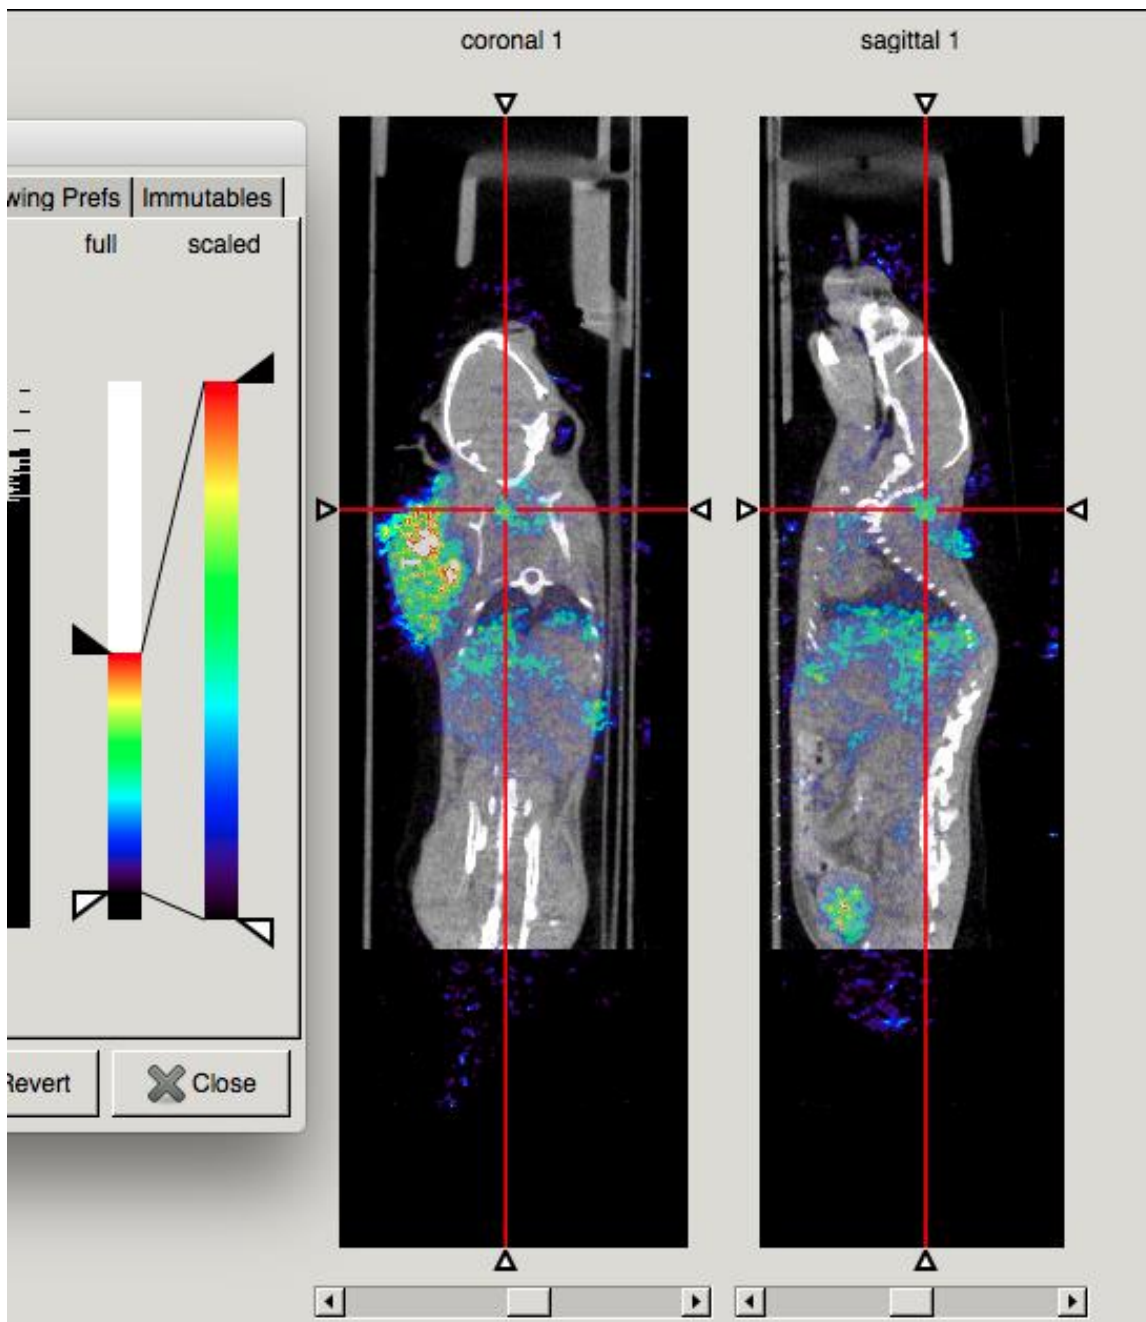

**Supplemental Figure 5.** A coronal and sagittal slice of a whole-body SPECT image of  $^{111}\text{In}$ -DTPA-anti-PD-L1-BC 24 hrs after injection in a prone C57BL/6 mouse bearing a B16F10 tumor. Signal from the BAT is highlighted by the red cross arrows.

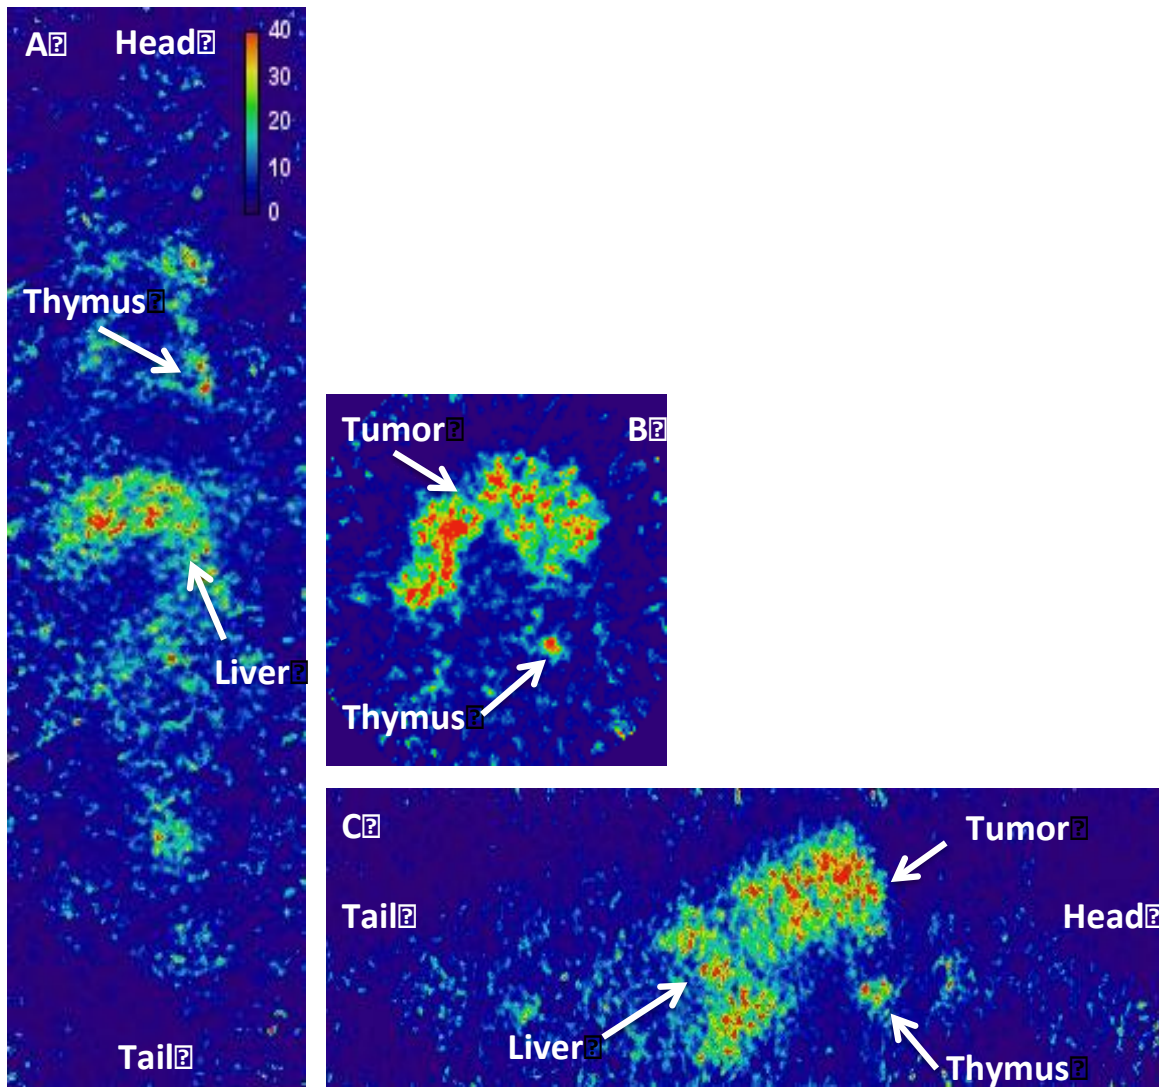

**Supplemental Figure 6.** A coronal (A), transverse (B), and sagittal (C) slice of a whole-body SPECT image of  $^{111}\text{In}$ -DTPA-anti-PD-L1-BC 72 hrs after injection in a prone C57BL/6 mouse bearing a B16F10 tumor. Voxel intensity (Mbc/ml) was calibrated from a SPECT image of a known activity and volume.
